# Supplementary material for: Mechanism-Based Approach to New Antibiotic Producers Screening among Actinomycetes in the Course of the Citizen Science Project
Source: MDPI journal article supplement (doi:10.3390/antibiotics11091198), 2022-09-05
Supplement: s1 [file s1]

## *Supplementary Materials*

# **Mechanism-Based Approach to New Antibiotic Producers Screening among Actinomycetes in the Course of the Citizen Science Project**

**Inna A. Volynkina** <sup>1,2,\*</sup>, **Yuliya V. Zakalyukina** <sup>3,4</sup>, **Vera A. Alferova** <sup>5,6</sup>, **Albina R. Belik** <sup>3</sup>, **Daria K. Yagoda** <sup>7</sup>, **Arina A. Nikandrova** <sup>1</sup>, **Yuliya A. Buyuklyan** <sup>3</sup>, **Andrei V. Udalov** <sup>3</sup>, **Evgenii V. Golovin** <sup>3</sup>, **Maxim A. Kryakvin** <sup>7</sup>, **Dmitrii A. Lukianov** <sup>1,2</sup>, **Mikhail V. Biryukov** <sup>1,3,8</sup>, **Petr V. Sergiev** <sup>1,2</sup>, **Olga A. Dontsova** <sup>1,2,5</sup> and **Ilya A. Osterman** <sup>1,2,3,\*</sup>

<sup>1</sup> Center of Life Sciences, Skolkovo Institute of Science and Technology, Bolshoy Boulevard 30, bld. 1, 121205 Moscow, Russia

<sup>2</sup> Department of Chemistry, Lomonosov Moscow State University, Leninskie Gory 1, 119991 Moscow, Russia

<sup>3</sup> Center for Translational Medicine, Sirius University of Science and Technology, Olympic Avenue 1, 354340 Sochi, Russia

<sup>4</sup> Department of Soil Science, Lomonosov Moscow State University, Leninskie Gory 1, 119991 Moscow, Russia

<sup>5</sup> Shemyakin-Ovchinnikov Institute of Bioorganic Chemistry, Miklukho-Maklaya 16/10, 117997 Moscow, Russia

<sup>6</sup> Gause Institute of New Antibiotics, B. Pirogovskaya 11, 119021 Moscow, Russia

<sup>7</sup> School of Bioengineering and Bioinformatics, Lomonosov Moscow State University, Leninskie Gory 1, 119991 Moscow, Russia

<sup>8</sup> Department of Biology, Lomonosov Moscow State University, Leninskie Gory 1, 119991 Moscow, Russia

\* Correspondence: Inna.Volynkina@skoltech.ru (I.A.V.); i.osterman@skoltech.ru (I.A.O.)

## Contents

|                                                                                                                                          |    |
|------------------------------------------------------------------------------------------------------------------------------------------|----|
| <b>Figure S1.</b> Double reporter system pDualrep3.....                                                                                  | 1  |
| <b>Figure S2.</b> Agar block diffusion assay of isolated actinomycetes (BV113, KB-1, Nm4) .....                                          | 2  |
| <b>Figure S3.</b> Utilization of different sugars (1.0%, w/v) as sole carbon source by strain KB-1.....                                  | 3  |
| <b>Figure S4.</b> Utilization of different sugars (1.0%, w/v) as sole carbon source by strain BV113.....                                 | 4  |
| <b>Figure S5.</b> MS/MS spectrum of the pikromycin $[M+H]^+$ ion at $m/z$ value 526.3370 .....                                           | 5  |
| <b>Figure S6.</b> MS/MS spectrum of the chartreusin $[M+Na]^+$ ion at $m/z$ value 663.1677.....                                          | 6  |
| <b>Table S1.</b> Physiological and biochemical characteristics of KB-1 isolate and closely related <i>Streptomyces</i> sp. strains.....  | 7  |
| <b>Table S2.</b> Physiological and biochemical characteristics of BV113 isolate and closely related <i>Streptomyces</i> sp. strains..... | 9  |
| <b>Table S3.</b> Composition of some nutrient media used .....                                                                           | 11 |
| <b>Supplementary References</b> .....                                                                                                    | 13 |

**Figure S1.** Double reporter system pDualrep3

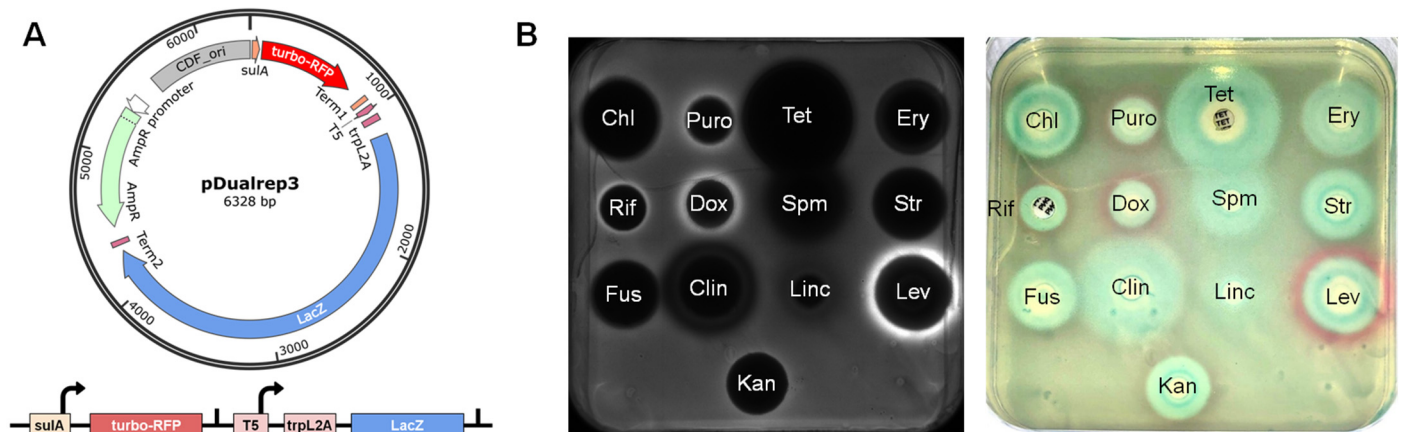

(A) pDualrep3 plasmid map and the reporter scheme. CDF\_ori, CloDF13-derived CDF replicon; sulA, promoter of the *sulA* gene; turbo-RFP, red fluorescent protein gene; T5, bacteriophage T5 promoter; trpL2A, modified *trpL* leader open reading frame carrying W10A and W11A substitutions; LacZ, β-galactosidase gene. Transcription start sites are shown by arrows. Transcription terminators are shown by vertical dashes. (B) Comparison of fluorescence signals using an imaging system (left) and with the naked eye (right). The plate was scanned in the Cy3 (for TurboRFP) channel. *Turbo-rfp* expression is visible in red to the naked eye in the zone of antibiotic sublethal concentrations. *LacZ* expression is visible in blue to the naked eye in the zone of antibiotic sublethal concentrations. An agar plate was coated with the *E.coli*  $\Delta tolC$  strain transformed with the pDualrep3 plasmid. A panel of antibiotics was used: chloramphenicol (Chl), puromycin (Puro), tetracycline (Tet), erythromycin (Ery), rifampicin (Rif), doxorubicin (Dox), spectinomycin (Spm), streptomycin (Str), fusidic acid (Fus), clindamycin (Clin), lincomycin (Linc), levofloxacin (Lev) and kanamycin (Kan).

**Figure S2.** Agar block diffusion assay of isolated actinomycetes (BV113, KB-1, Nm4)

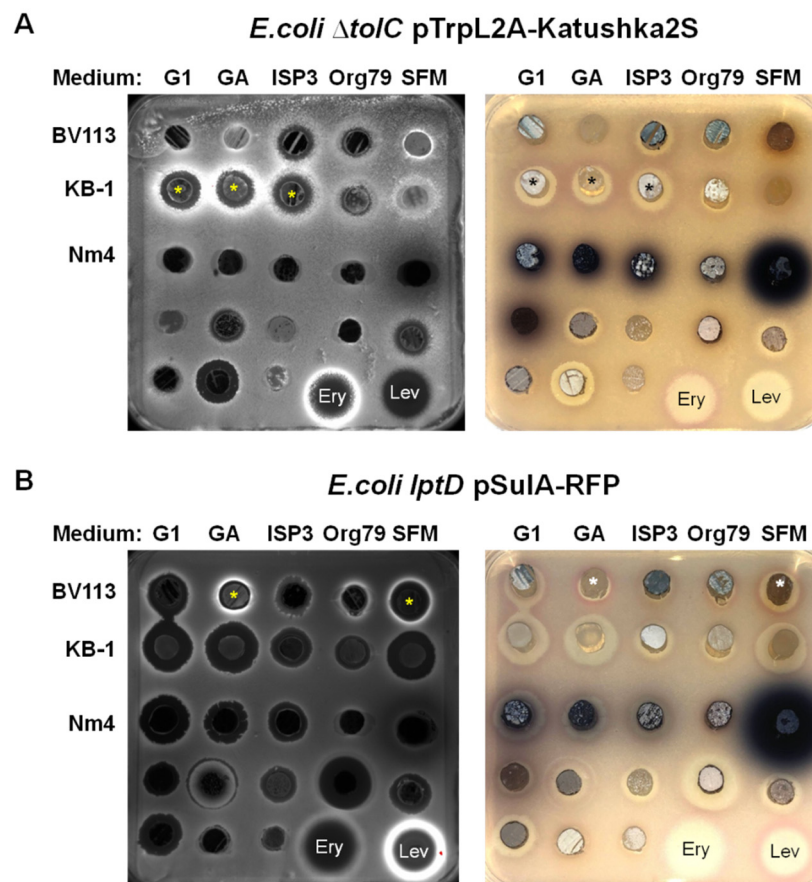

Different nutrient media (G1, GA, ISP3, Org79, SFM) were used to obtain blocks with mycelium and assess their antibacterial activity (for details, see Table S3). *Streptomyces* sp. KB-1 produces a compound that inhibits the growth of *E.coli*  $\Delta tolC$  and *lptD* strains, revealing a strong pTrpL2A-Katushka2S reporter induction (marked with asterisks (\*)) in the picture **A**). *Streptomyces* sp. BV113 produces a compound that primarily inhibits the growth of *E.coli* *lptD* strain, revealing a strong pSulA-RFP reporter induction (marked with asterisks (\*)) in the picture **B**). Comparison of fluorescence signals using an imaging system (left) and with the naked eye (right). The upper plate (**A**) was scanned in the Cy5 (for Katushka2S) channel, the lower plate (**B**) was scanned in the Cy3 (TurboRFP) channel (left). Katushka2S and TurboRFP are visible to the naked eye in lilac and orange-red colors, respectively, in the zone of antibiotic sublethal concentrations (right). Agar plates were coated with either the *E.coli*  $\Delta tolC$  strain transformed with the pTrpL2A-Katushka2S plasmid, or the *E.coli* *lptD* strain transformed with the pSulA-RFP plasmid. Antibiotics erythromycin (Ery) and levofloxacin (Lev) were used as controls.

**Figure S3.** Utilization of different sugars (1.0%, w/v) as sole carbon source by strain KB-1

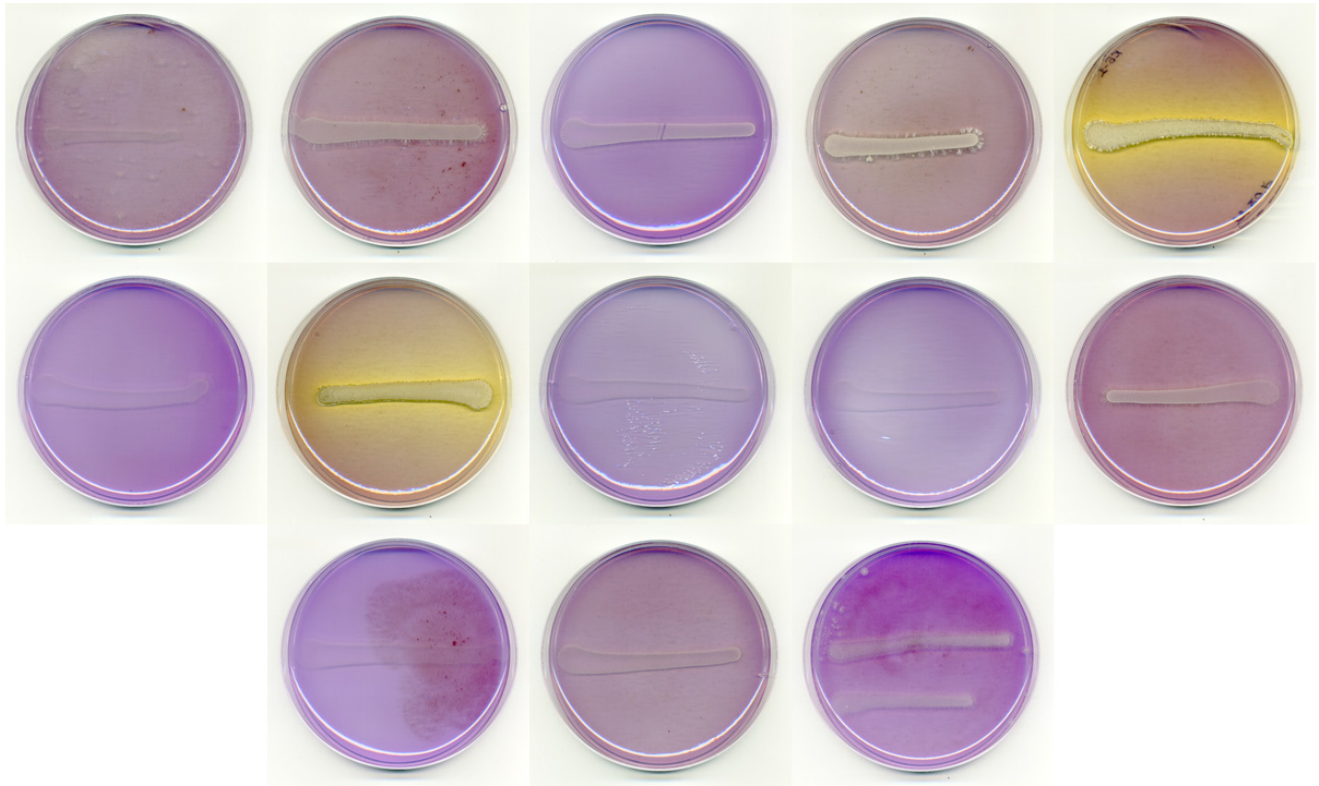

Top row: basal agar medium (ISP9) without sugar, arabinose, fructose, galactose, glucose. Middle row: inositol, maltose, mannite, raffinose, rhamnose. Bottom row: sorbitol, sucrose, xylose.

**Figure S4.** Utilization of different sugars (1.0%, w/v) as sole carbon source by strain BV113

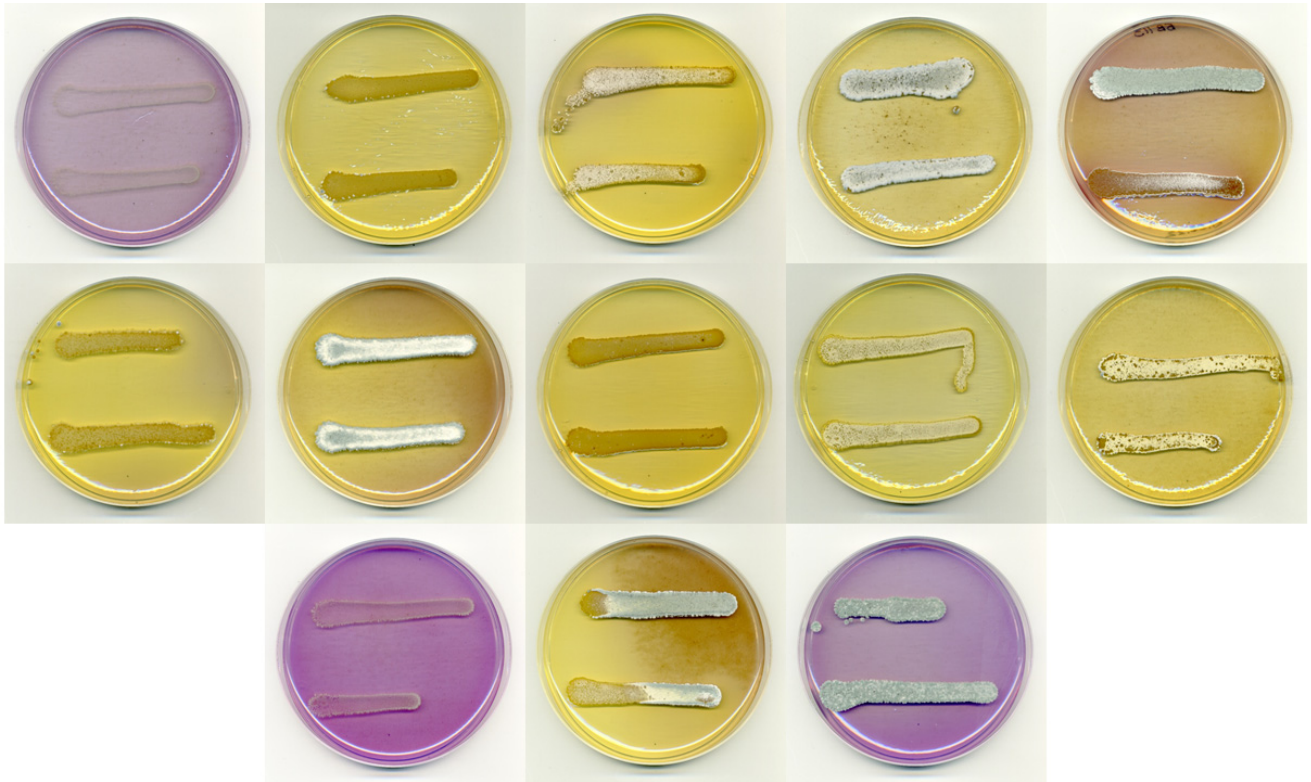

Top row: basal agar medium (ISP9) without sugar, arabinose, fructose, galactose, glucose. Middle row: inositol, maltose, mannite, raffinose, rhamnose. Bottom row: sorbitol, sucrose, xylose.

**Figure S5.** MS/MS spectrum of the pikromycin  $[M+H]^+$  ion at  $m/z$  value 526.3370

## Generic Display Report

### Analysis Info

Analysis Name D:\Data\OS\OS\_KB1\_F3\_6\_RA3\_1\_31.d  
Method 10\_95ACN\_HE\_MSMS.m  
Sample Name OS\_KB1\_F3\_6  
Comment

Acquisition Date 8/2/2021 12:55:10 PM

Operator Demo User  
Instrument maXis II ETD

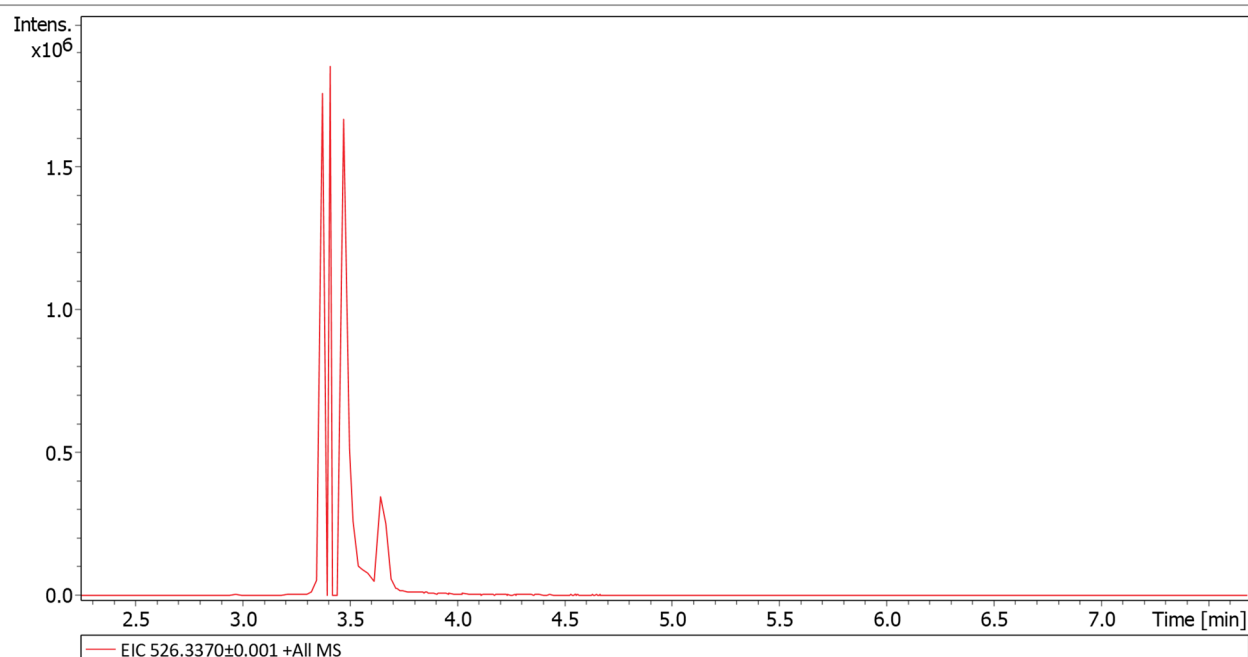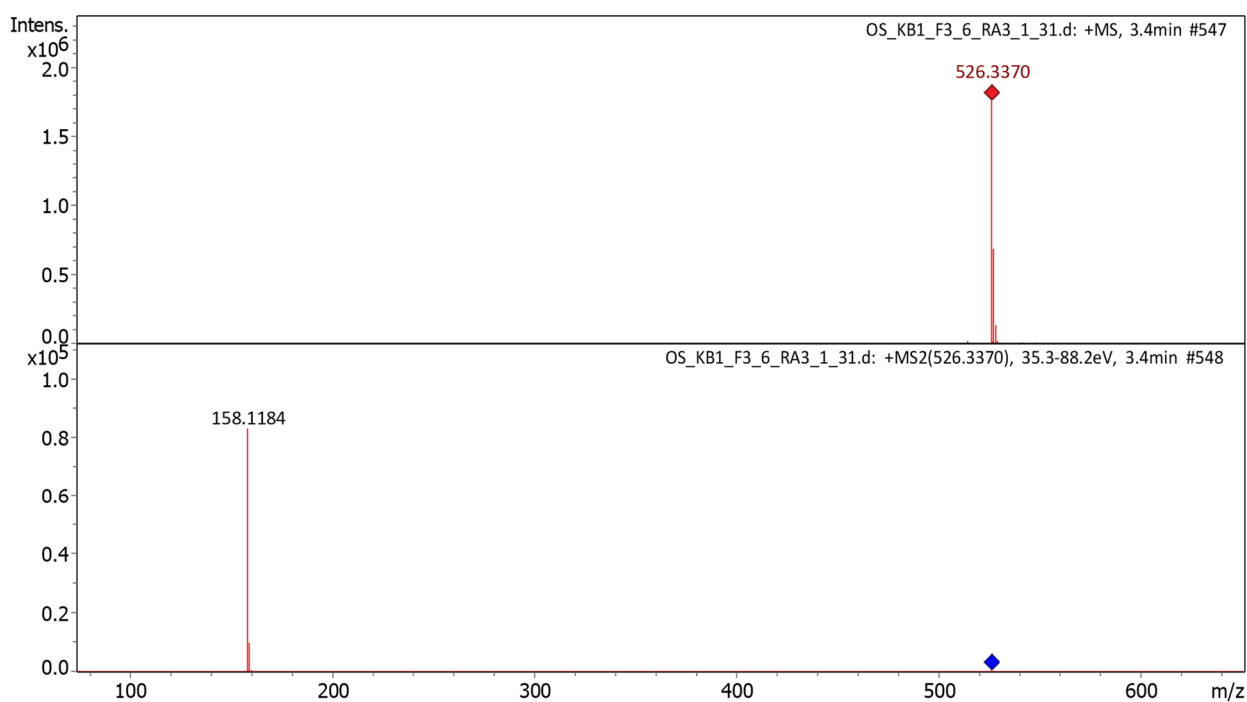

**Figure S6.** MS/MS spectrum of the chartreusin  $[M+Na]^+$  ion at  $m/z$  value 663.1677

### Generic Display Report

#### Analysis Info

Analysis Name D:\Data\Service\210621\OS\_BV113-ACN30\_8\_9.d  
Method Syringe\_MSMS\_POS.m  
Sample Name OS\_BV113-ACN30\_8\_9  
Comment

Acquisition Date 7/20/2021 4:54:22 PM

Operator Demo User  
Instrument maXis II ETD

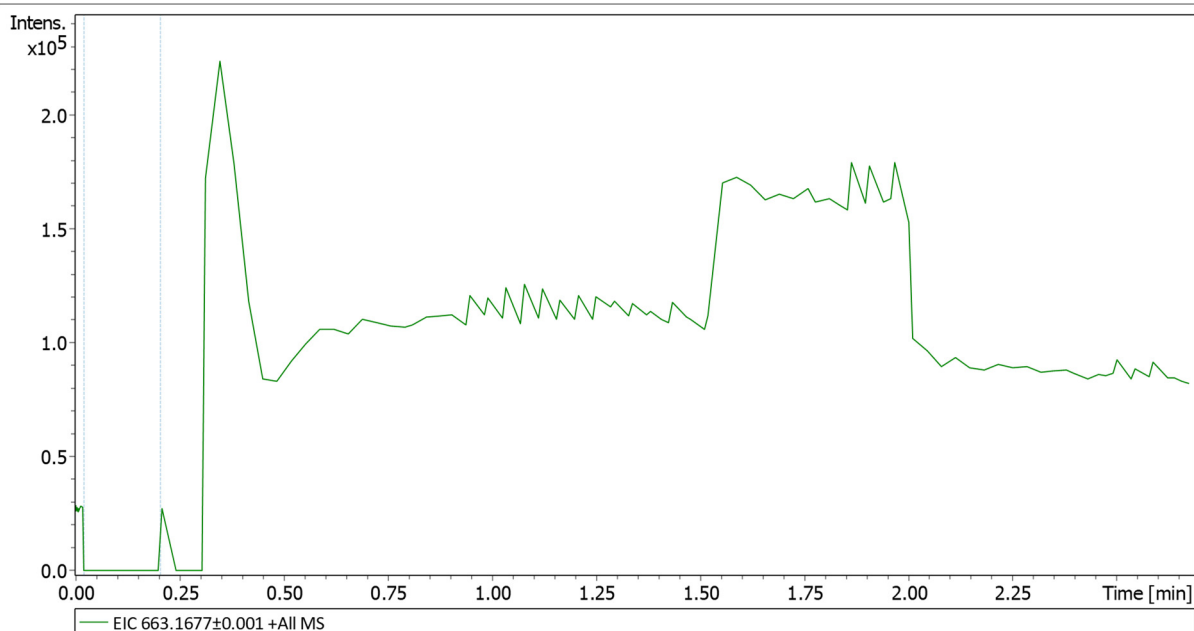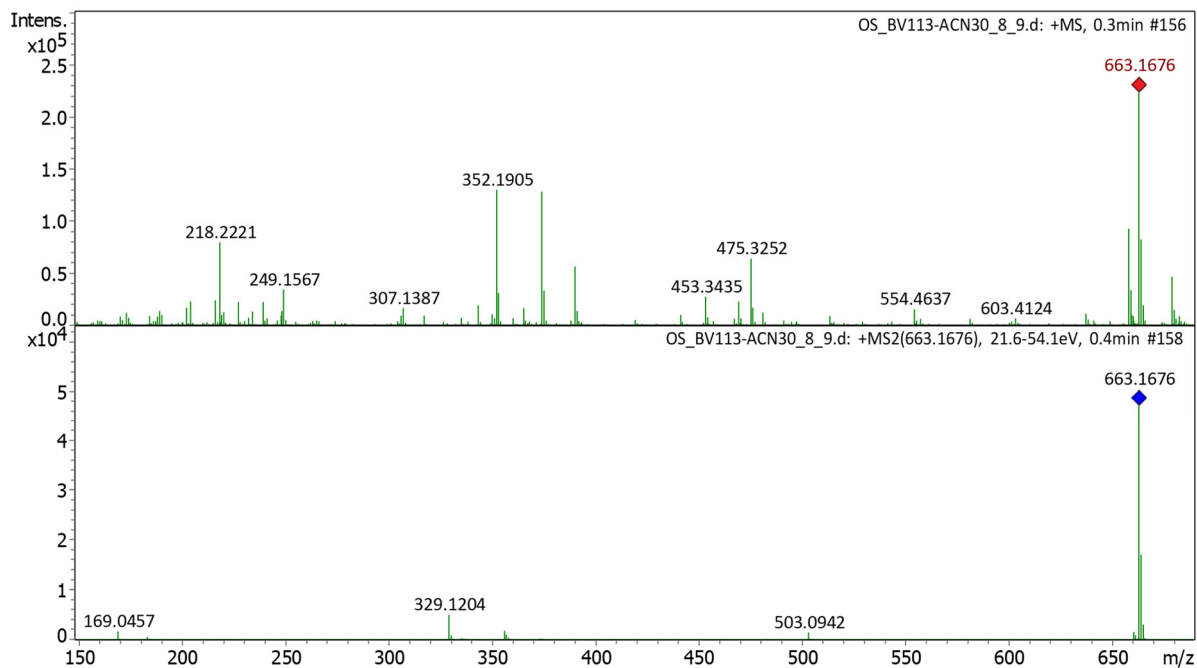

The data acquired with direct sample injection, no retention time included in this report.

**Table S1.** Physiological and biochemical characteristics of KB-1 isolate and closely related *Streptomyces* sp. strains

| Properties                                 | KB-1                        | <i>Streptomyces zaomyceticus</i> NRRL B-2038 <sup>T</sup> | <i>Streptomyces exfoliatus</i> NBRC 13191 <sup>T</sup> | <i>Streptomyces venezuelae</i> ATCC 10712 <sup>T</sup> |
|--------------------------------------------|-----------------------------|-----------------------------------------------------------|--------------------------------------------------------|--------------------------------------------------------|
| Cultural characteristics                   |                             |                                                           |                                                        |                                                        |
| Growth on ISP2/ISP3/ISP4                   | Good                        | Good                                                      | Good                                                   | Good                                                   |
| Color of aerial mycelium on ISP2/ISP3/ISP4 | White/light gray/light gray | White/gray/gray                                           | White/rose/rose                                        | Gray/white/gray                                        |
| Colony Reverse on ISP2/ISP3/ISP4           | Colorless                   | Brown/ivory/ivory                                         | Ivory/yellow/gray brown                                | Brown/yellow/ivory                                     |
| Diffusible pigment on ISP2/ISP3/ISP4       | None                        | None                                                      | None                                                   | Brown/none/none                                        |
| Melanoid pigment on ISP6                   | —                           | +                                                         | —                                                      | +                                                      |
| Morphological characteristics              |                             |                                                           |                                                        |                                                        |
| Spore surface                              | Smooth                      | Smooth                                                    | Smooth                                                 | Smooth                                                 |
| Spore chains morphology                    | Straight                    | Straight                                                  | Straight                                               | Straight                                               |
| Physiological characteristics              |                             |                                                           |                                                        |                                                        |
| Temperature-range and optimum (°C)         | 15-30 (25)                  | (30)                                                      | (30)                                                   | (30)                                                   |
| Acid from carbohydrates                    |                             |                                                           |                                                        |                                                        |
| Arabinose                                  | —                           | +                                                         | +                                                      | +                                                      |
| Fructose                                   | —                           | +/-                                                       | +                                                      | +/-                                                    |
| Galactose                                  | —                           | n/d                                                       | n/d                                                    | n/d                                                    |
| Glucose                                    | +                           | +                                                         | +                                                      | +                                                      |
| Inositol                                   | —                           | +/-                                                       | —                                                      | —                                                      |
| Maltose                                    | +                           | n/d                                                       | n/d                                                    | n/d                                                    |
| Mannitol                                   | —                           | +/-                                                       | —                                                      | —                                                      |
| Raffinose                                  | —                           | —                                                         | +                                                      | —                                                      |
| Rhamnose                                   | —                           | —                                                         | +                                                      | +/-                                                    |
| Sorbitol                                   | —                           | n/d                                                       | n/d                                                    | n/d                                                    |
| Sucrose                                    | —                           | +/-                                                       | +                                                      | —                                                      |
| Xylose                                     | —                           | +/-                                                       | +                                                      | —                                                      |
| Degradation of                             |                             |                                                           |                                                        |                                                        |
| Starch                                     | +                           | n/d                                                       | n/d                                                    | n/d                                                    |
| Gelatin                                    | +                           | +                                                         | n/d                                                    | +                                                      |

---

|           |    |     |     |     |
|-----------|----|-----|-----|-----|
| Casein    | +  | n/d | n/d | n/d |
| Cellulose | ++ | —   | n/d | —   |

+, positive; —, negative; n/d, not determined

The sources used for: *Streptomyces zaomyceticus* NRRL B-2038<sup>T</sup> and *Streptomyces exfoliatus* NBRC 13191<sup>T</sup> [1], *Streptomyces venezuelae* ATCC 10712<sup>T</sup> (<https://bacdiver.dsmz.de> (accessed on 11 April 2022)).

**Table S2.** Physiological and biochemical characteristics of BV113 isolate and closely related *Streptomyces* sp. strains

| Properties                                 | BV113                          | <i>Streptomyces osmaniensis</i> OU-63 <sup>T</sup> | <i>Streptomyces galbus</i> JCM 4570 <sup>T</sup> | <i>Streptomyces chartreusis</i> NBRC 12753 <sup>T</sup> |
|--------------------------------------------|--------------------------------|----------------------------------------------------|--------------------------------------------------|---------------------------------------------------------|
| Cultural characteristics                   |                                |                                                    |                                                  |                                                         |
| Growth on ISP2/ISP3/ISP4                   | Good                           | Good                                               | Good                                             | Good                                                    |
| Color of aerial mycelium on ISP2/ISP3/ISP4 | White/Pale green/<br>pale blue | Bluish gray                                        | Silk gray/traffic gray/<br>light ivory           | Pastel turquoise                                        |
| Colony reverse on ISP2/ISP3/ISP4           | None/yellow/none               | Pale yellow                                        | Orange brown/honey<br>yellow/ochre brown         | Colorless                                               |
| Diffusible pigment on ISP2/ISP3/ISP4       | None/yellow/none               | None                                               | Honey yellow/lemon<br>yellow/honey yellow        | None                                                    |
| Melanoid pigment on ISP6                   | +                              | +                                                  | —                                                | +                                                       |
| Morphological characteristics              |                                |                                                    |                                                  |                                                         |
| Spore surface                              | Spiny                          | Spiny                                              | Smooth                                           | Spiny                                                   |
| Spore chains morphology                    | Spirales                       | Spirales                                           | Spirales                                         | Spirales                                                |
| Physiological characteristics              |                                |                                                    |                                                  |                                                         |
| Temperature-range and optimum (°C)         | 20-40 (37)                     | 15-40                                              | (28)                                             | (30)                                                    |
| pH-range and optimum                       | 5-9 (7)                        | 6-10                                               | n/d                                              | n/d                                                     |
| Acid from carbohydrates                    |                                |                                                    |                                                  |                                                         |
| Arabinose                                  | +                              | +                                                  | +                                                | +                                                       |
| Fructose                                   | +                              | +                                                  | +                                                | +                                                       |
| Galactose                                  | +                              | +                                                  | n/d                                              | +                                                       |
| Glucose                                    | +                              | +                                                  | +                                                | +                                                       |
| Inositol                                   | —                              | +                                                  | +                                                | +                                                       |
| Maltose                                    | —                              | +                                                  | n/d                                              | n/d                                                     |
| Mannitol                                   | +                              | +                                                  | n/d                                              | +                                                       |
| Raffinose                                  | +                              | +                                                  | +                                                | +                                                       |
| Rhamnose                                   | +                              | +                                                  | —                                                | +                                                       |
| Sorbitol                                   | —                              | +                                                  | n/d                                              | n/d                                                     |
| Sucrose                                    | +                              | +                                                  | +                                                | +                                                       |
| Xylose                                     | —                              | +                                                  | +                                                | +                                                       |
| Degradation of                             |                                |                                                    |                                                  |                                                         |
| Starch                                     | +                              | +                                                  | n/d                                              | +                                                       |
| Gelatin                                    | +                              | +                                                  | +                                                | +                                                       |

|                               |           |           |     |     |
|-------------------------------|-----------|-----------|-----|-----|
| Casein                        | +         | —         | n/d | +   |
| Cellulose                     | +         | +         | +   | +   |
| Antibiotic resistance         |           |           |     |     |
| Erythromycin,<br>5 µg/disk    | resistant | n/d       | n/d | n/d |
| Vancomycin,<br>5 µg/disk      | sensitive | n/d       | n/d | n/d |
| Levofloxacin,<br>5 µg/disk    | sensitive | n/d       | n/d | n/d |
| Tetracycline,<br>12.5 µg/disk | sensitive | n/d       | n/d | n/d |
| Streptomycin,<br>10 µg/disk   | sensitive | sensitive | n/d | n/d |

+, positive; —, negative; n/d, not determined

The sources used for: *Streptomyces osmaniensis* OU-63<sup>T</sup> [2], *Streptomyces galbus* JCM 4570<sup>T</sup> and *Streptomyces chartreusis* NBRC 12753<sup>T</sup> (<https://bacdiv.dsmz.de> (accessed on 11 April 2022)).

**Table S3.** Composition of some nutrient media used

| Medium                          | Acronym | Ingredients (g/L)                                                                                                                                                                                                                                                                                     | References |
|---------------------------------|---------|-------------------------------------------------------------------------------------------------------------------------------------------------------------------------------------------------------------------------------------------------------------------------------------------------------|------------|
| Mineral agar Gauze 1            | G1      | Soluble starch - 20<br>KNO <sub>3</sub> - 1<br>K <sub>2</sub> HPO <sub>4</sub> · 7H <sub>2</sub> O - 0.5<br>NaCl - 0.5<br>MgSO <sub>4</sub> · 7H <sub>2</sub> O - 0.5<br>FeSO <sub>4</sub> · 7H <sub>2</sub> O - 0.01<br>pH adjusted to 7.2<br>Agar - 20                                              | [3]        |
| Organic medium 79               | Org79   | Glucose - 10<br>Peptone - 10<br>Casein hydrolysate - 2<br>Yeast extract - 2<br>NaCl - 6<br>pH adjusted to 7.0<br>Agar - 20                                                                                                                                                                            | [4]        |
| Glucose-asparagine agar         | GA      | Glucose - 10<br>Asparagine - 0.5<br>K <sub>2</sub> HPO <sub>4</sub> - 0.5<br>Agar - 20                                                                                                                                                                                                                | [5]        |
| Soy flour mannitol agar         | SFM     | Mannitol - 20<br>Soy flour - 20<br>pH adjusted to 8.0<br>Agar - 20                                                                                                                                                                                                                                    | [6]        |
| Yeast extract-malt extract agar | ISP2    | Bacto-yeast extract - 4<br>Bacto-malt extract - 10<br>Bacto-dextrose - 4<br>pH adjusted to 7.3<br>Bacto-agar - 20                                                                                                                                                                                     | [7]        |
| Oatmeal agar                    | ISP3    | Oatmeal - 20<br>FeSO <sub>4</sub> · 7H <sub>2</sub> O - 0.001<br>MnCl <sub>2</sub> · 4H <sub>2</sub> O - 0.001<br>ZnSO <sub>4</sub> · 7H <sub>2</sub> O - 0.001<br>pH adjusted to 7.2<br>Agar - 18                                                                                                    | [7]        |
| Inorganic salts-starch agar     | ISP4    | Soluble starch - 10<br>K <sub>2</sub> HPO <sub>4</sub> - 1<br>MgSO <sub>4</sub> · 7H <sub>2</sub> O - 1<br>NaCl - 1<br>(NH <sub>4</sub> ) <sub>2</sub> SO <sub>4</sub> - 2<br>CaCO <sub>3</sub> - 2<br>FeSO <sub>4</sub> · 7H <sub>2</sub> O - 0.001<br>MnCl <sub>2</sub> · 4H <sub>2</sub> O - 0.001 | [7]        |

|                                 |         |                                                                                                                                                                                                                                                                                                                                                                                                                                                                                          |                                  |
|---------------------------------|---------|------------------------------------------------------------------------------------------------------------------------------------------------------------------------------------------------------------------------------------------------------------------------------------------------------------------------------------------------------------------------------------------------------------------------------------------------------------------------------------------|----------------------------------|
|                                 |         | ZnSO <sub>4</sub> · 7H <sub>2</sub> O - 0.001<br>pH adjusted to 7.0 - 7.4<br>Agar - 20                                                                                                                                                                                                                                                                                                                                                                                                   |                                  |
| Peptone-yeast extract iron agar | ISP6    | Bacto-peptone iron agar - 36<br>Bacto-yeast extract - 1<br>pH adjusted to 7.0 - 7.2                                                                                                                                                                                                                                                                                                                                                                                                      | [7]                              |
| Basal agar medium               | ISP9    | Carbon source - 1% (w/v)<br>(NH <sub>4</sub> ) <sub>2</sub> SO <sub>4</sub> - 2.64<br>KH <sub>2</sub> PO <sub>4</sub> - 2.38<br>K <sub>2</sub> HPO <sub>4</sub> · 3H <sub>2</sub> O - 5.65<br>MgSO <sub>4</sub> · 7H <sub>2</sub> O - 1<br>CuSO <sub>4</sub> · 5H <sub>2</sub> O - 0.0064<br>FeSO <sub>4</sub> · 7H <sub>2</sub> O - 0.0011<br>MnCl <sub>2</sub> · 4H <sub>2</sub> O - 0.0079<br>ZnSO <sub>4</sub> · 7H <sub>2</sub> O - 0.0015<br>pH adjusted to 6.8 - 7.0<br>Agar - 15 | [7]                              |
| Actinomyces Isolation Agar      | M490    | Sodium caseinate - 2<br>L-Asparagine - 0.1<br>Sodium propionate - 4<br>K <sub>2</sub> HPO <sub>4</sub> - 0.5<br>MgSO <sub>4</sub> - 0.1<br>FeSO <sub>4</sub> - 0.001<br>pH adjusted to 8.1 ± 0.2<br>Agar - 15<br>Glycerol - 5 ml                                                                                                                                                                                                                                                         | [8]<br>(HiMedia<br>Laboratories) |
| Humic acid-vitamin agar         | HV agar | Humic acid - 1<br>Na <sub>2</sub> HPO <sub>4</sub> - 0.5<br>KCl - 1.71<br>MgSO <sub>4</sub> · 7H <sub>2</sub> O - 0.05<br>FeSO <sub>4</sub> · 7H <sub>2</sub> O - 0.01<br>CaCO <sub>3</sub> - 0.02<br>Thiamine-HCl - 0.0005<br>Riboflavin - 0.0005<br>Niacin - 0.0005<br>Pyridoxine-HCl - 0.0005<br>Inositol - 0.0005<br>Ca-pantothenate - 0.0005<br><i>p</i> -aminobenzoic acid - 0.0005<br>Biotin - 0.00025<br>pH adjusted to 7.2<br>Agar - 18                                         | [9]                              |

---

## Supplementary References

1. Shirling, E.B.; Gottlieb, D. Cooperative description of type cultures of *Streptomyces*. II. Species descriptions from first study. *International Journal of Systematic Bacteriology* **1968**, *18*, 69-189, doi:10.1099/00207713-18-2-69.
2. Reddy, T.V.K.; Mahmood, S.; Idris, M.M.; Ciesielski, S. *Streptomyces osmaniensis* sp. nov., isolated from soil. *International journal of systematic and evolutionary microbiology* **2010**, *60*, 1755-1759, doi:10.1099/ij.s.0.017749-0.
3. Gause, G.F.; Preobrazhenskaya, T.P.; Sveshnikova, M.A.; Terekhova, L.P.; Maksimova, T.S. *Guide for Determination of Actinomycetes: Genera Streptomyces, Streptoverticillium, and Chainia.*; Nauka: Moscow, USSR, 1983; Volume 1.
4. Prauser, H.; Falta, R. [Phage sensitivity, cell wall composition and taxonomy of actinomycetes]. *Zeitschrift fur allgemeine Mikrobiologie* **1968**, *8*, 39-46, doi:10.1002/jobm.3630080106.
5. Krainsky, A. Die Actinomyceten und ihre Bedeutung in der Natur. *Zentralblatt fur Bakteriologie, Parasitenkunde, Infektionskrankheiten und Hygiene. 1. Abt. Medizinisch-hygienische Bakteriologie, Virusforschung und Parasitologie. Originale* **1914**, *42*, 649-688.
6. Hobbs, G.; Frazer, C.M.; Gardner, D.C.; Cullum, J.A.; Oliver, S.G. Dispersed growth of *Streptomyces* in liquid culture. *Applied Microbiology and Biotechnology* **1989**, *31*, 272-277, doi:10.1007/BF00258408.
7. Shirling, E.B.; Gottlieb, D. Methods for characterization of *Streptomyces* species. *International Journal of Systematic Bacteriology* **1966**, *16*, 313-340, doi:10.1099/00207713-16-3-313.
8. MacFaddin, J.F. *Media for Isolation-Cultivation-Identification-Maintenance of Medical Bacteria*; Williams & Wilkins: Baltimore, MD, USA, 1985; Volume 1.
9. Hayakawa, M.; Nonomura, H. Humic Acid-Vitamin Agar, a New Medium for the Selective Isolation of Soil Actinomycetes. *Journal of Fermentation Technology* **1987**, *65*, 501-509, doi:10.1016/0385-6380(87)90108-7.
